# Supplementary material for: Stepwise Adipogenesis of Decellularized Cellular Extracellular Matrix Regulates Adipose Tissue-Derived Stem Cell Migration and Differentiation
Source: Hindawi journal article supplement (doi:10.1155/2019/1845926), 2019-11-06
Supplement: f1 [file 1845926.f1.pdf]

## **Supplemental information**

### **Stepwise adipogenesis of decellularized cellular extracellular matrix regulates adipose tissue-derived stem cell migration and differentiation**

**Ziang Zhang<sup>1,2</sup>, Rongmei Qu<sup>1</sup>, Tingyu Fan<sup>1</sup>, Jun Ouyang<sup>1</sup>, Feng Lu<sup>2\*</sup>, Jingxing Dai<sup>1\*</sup>**

Figure. S1. Differentiation of ASCs. (a) Rat adipose tissue-derived stromal cells (ASCs) were maintained and expanded in growth medium. Bar, 100  $\mu\text{m}$ . (b) ASCs were cultured in adipogenic medium to and differentiated into adipocytes over 14 days. Scale bar = 100  $\mu\text{m}$ .

Growth

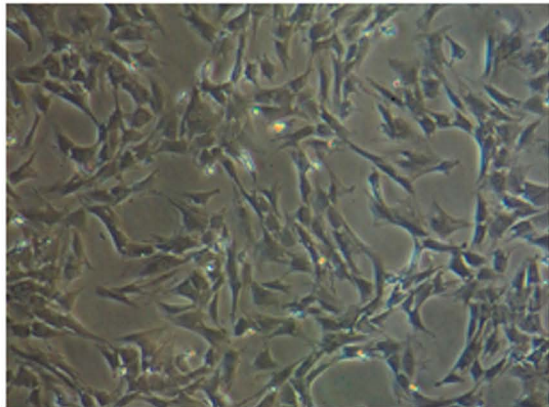

(a)

Adipogenic

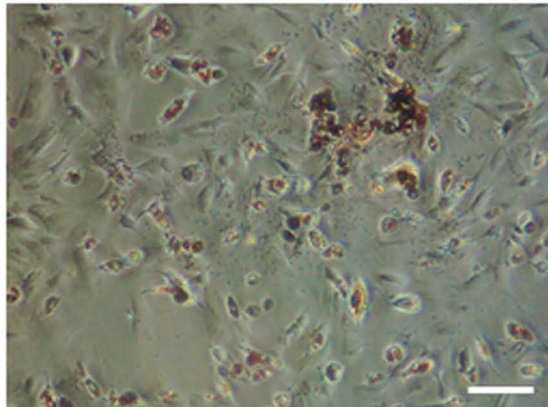

(b)
